*Pseudomonas aeruginosa* TfpW is a multifunctional D-Araf glycosyltransferase and oligosaccharyltransferase

Anne D. Villela, Hanjeong Harvey, Katherine Graham and Lori L. Burrows \*

From the Department of Biochemistry and Biomedical Sciences and the Michael G. DeGroot Institute for Infectious Disease Research, McMaster University, Hamilton, Ontario L8S 4K1

Running title: TfpW is a multifunctional enzyme

\*To whom correspondence may be addressed: MDCL 2238, 1280 Main St. West, Hamilton, Ontario L8S 4K1 Canada. Tel.: 905-525-9140 (Ext. 22029); Fax: 905-522-9033; E-mail: lori.burrows@mcmaster.ca

Keywords: glycosyltransferase, type IV pili, *Pseudomonas aeruginosa*, polysaccharide, protein complex, membrane protein

---

## ABSTRACT

TfpW is an oligosaccharyltransferase that modifies the subunits of type IV pili from group IV strains of *Pseudomonas aeruginosa* with oligomers of  $\alpha$ -1,5-linked-D-arabinofuranose (D-Araf). Besides its oligosaccharyltransferase activity, TfpW may be responsible for periplasmic translocation and polymerization of D-Araf. Here we investigated these potential roles of TfpW in Pa5196 pilin glycosylation. Topology studies confirmed the periplasmic location of loop 1 and the large C-terminus domain, however the central portion of TfpW had an indeterminate configuration. Reconstitution of the Pa5196 pilin glycosylation system by providing *pilA*, *tfpW* +/- *tfpX* and the D-Araf biosynthesis genes *PsPA7\_6246-6249* showed that TfpW is sufficient for glycan polymerization and transfer to pilins in *P. aeruginosa* PAO1, while TfpX is also necessary in *Escherichia coli*. In addition to *PsPA7\_6246*, DprE1 (*PsPA7\_6248*) and DprE2 (*PsPA7\_6249*), the GtrA-like component *PsPA7\_6247* was required for pilin glycosylation in *E. coli* versus PAO1. In a PAO1  $\Delta$ *arnE/F* mutant, loss of *PsPA7\_6247* expression decreased the level of pilin glycosylation, suggesting that *arnE/F* may play a role in pilin glycosylation when *PsPA7\_6247* is absent. Bacterial two-hybrid studies showed interactions of TfpW with itself, TfpX,

*PsPA7\_6247* and DprE2, suggesting the formation of a complex that enables efficient pilin glycosylation. Fluorescence microscopy of *E. coli* and Pa5196 $\Delta$ *dprE1* expressing a DprE1-sGFP fusion showed that the protein is expressed in the cytoplasm, supporting our model that includes cytoplasmic biosynthesis of the lipid carrier-linked D-Araf precursor prior to its periplasmic translocation. Together these data suggest that TfpW may be the first example of a trifunctional flippase, glycosyltransferase, and oligosaccharyltransferase.

---

## INTRODUCTION

*Pseudomonas aeruginosa* is an opportunistic pathogen and the major cause of morbidity and mortality among cystic fibrosis patients (1). It is among the pathogens listed as ‘critical’ by the World Health Organization for new antibiotic development. Among the important virulence factors of *P. aeruginosa* are its type IV pili (T4P) (2,3). T4P are expressed on the cell surface and are involved in adherence, motility, and pathogenesis (2,3). They are helical protein polymers containing thousands of copies of the major pilin, PilA. Five different PilA variants (groups I through V) were identified in *P. aeruginosa* strains, differing in amino acid

sequence, association with unique accessory genes, and post-translational modifications (4). Pilins from group IV (e.g. strains Pa5196 and PA7), are modified with homo-oligomers of  $\alpha$ -1,5-linked-D-arabinofuranose (D-Araf), O-linked to multiple Ser and Thr residues, predominately at Thr64 and Thr66 (5,6). The same D-Araf configuration is found in arabinogalactan (7) and lipoarabinomannan (8), major components of the *Mycobacterium tuberculosis* cell wall. Antisera against LAM from *M. tuberculosis* cross-reacts with D-Araf modified pilins, while Pa5196 pilin antisera recognizes cell wall material from *Mycobacterium smegmatis* (5).

Pilin glycosylation requires synthesis of the glycan, its translocation to the periplasm, and transfer to the protein acceptor. The *P. aeruginosa* biosynthetic pathway for D-Araf is encoded by a cluster of seven genes (*PsPA7\_6245-6251*; the *PsPA7* prefix will be omitted below for brevity) (9). 6245, 6246, 6248 and 6249 are homologues of the *M. tuberculosis* H37Rv genes Rv3807c (encoding decaprenylphosphoryl-5-phosphoribose phosphatase), Rv3806c (encoding decaprenyl-P-ribose-5-P, DPPR, synthetase), Rv3790 (encoding decaprenylphosphoryl- $\beta$ -D-ribose oxidase, DprE1) and Rv3791 (encoding decaprenylphosphoryl-2-keto- $\beta$ -D-erythro-pentose reductase, DprE2) (9). The remaining genes 6247, 6250, and 6251 encode hypothetical proteins. Expression of 6246, DprE1, and DprE2 is essential for Pa5196 twitching motility and pilin glycosylation (9). A Pa5196 6245 mutant produced less heavily glycosylated pilins, while loss of 6250 and 6251 expression did not alter glycosylation (9). No homologues of *emb*, encoding the *Corynebacterium* enzyme that generates  $\alpha$ -1,5-linked D-Araf polymers, were identified in the *P. aeruginosa* D-Araf biosynthetic cluster (9). The mechanism by which D-Araf is translocated to the periplasm, either as single sugars or as  $\alpha$ -1,5-linked oligosaccharides, is also unknown.

TfpW is a putative glycosyltransferase (GT) belonging to a family of membrane-bound GT-C enzymes and has very limited amino acid sequence similarity to *Corynebacterium* Emb and related arabinosyltransferases such as *M. tuberculosis*

EmbA/B/C (5). *tfpW* is immediately downstream of *pilA* in strains Pa5196 and PA7, and encodes a 646 amino acid product with a cytoplasmic N-terminus, 11 predicted transmembrane  $\alpha$ -helices and a large periplasmic C-terminal region containing a tetratricopeptide repeat (TPR) structural domain (5). TPR motifs consist of  $\sim$ 34 residue helical hairpins arranged as tandem repeats. They mediate protein-protein or protein-sugar interactions, and assembly of multiprotein complexes (10). Loss of TfpW abrogates pilin glycosylation, including the addition of single sugars (5). Complementation of a *tfpW* mutant with TfpW containing mutations in the conserved glycosyltransferase motif (DDX) found in GT-C superfamily members failed to restore pilin glycosylation, but it was not clear whether that was due to loss of oligosaccharide biosynthesis or of glycan transfer to the protein acceptor (5). The *tfpX* gene, located downstream of *tfpW*, cannot mediate glycosylation, since complementation of a Pa5196 *tfpW* mutant with *pilA+tfpX* failed to restore modification (5).

Phylogenetically, the *P. aeruginosa* group IV pilin is more similar to Pile from *Neisseria gonorrhoeae* and *N. meningitidis* than to other *P. aeruginosa* pilins (4). In *Neisseria*, cytoplasmic enzymes generate undecaprenol-linked oligosaccharides and the PglF flippase translocates them to the periplasm where they are attached to pilins by the PglL O-oligosaccharyltransferase (11). PglL has extreme substrate promiscuity, transferring any glycan from the lipid carrier to pilins (12). In group I strains of *P. aeruginosa*, the oligosaccharyltransferase TfpO (PilO) has a relaxed glycan specificity (13), transferring a lipopolysaccharide (LPS) O-antigen unit (3-5 sugars, depending on the serotype) to the C-terminal Ser of cognate pilins. In that case, undecaprenol-linked O-antigen units are first synthesized by the cytoplasmic LPS biosynthetic machinery, then translocated to the periplasm by the O-unit flippase Wzx (3), where they are accessed by TfpO.

No flippase for the D-Araf glycans that decorate group IV pilins has been identified. Although it lacks sequence similarity with PglF or Wzx, TfpW's predicted topology is compatible with that

of flippases. It could be responsible for the translocation of lipid-linked D-Araf precursors, either single sugars or  $\alpha$ -1,5 linked oligosaccharides. Further, TfpW's weak similarity to Emb enzymes and essential DDX motif suggest it has GT activity, consistent with forming  $\alpha$ -1,5 linked D-Araf oligosaccharides. Therefore, TfpW may be a flippase, glycosyltransferase, and oligosaccharyltransferase.

Here we further investigated the potential roles of TfpW in Pa5196 pilin glycosylation, important for pilin folding, stability, assembly, and function (5,9). Topology and structure prediction studies were used to evaluate conserved regions of TfpW that may be responsible for its potential activities. The Pa5196 pilin glycosylation system was reconstituted in PAO1, a laboratory strain that expresses non-glycosylated pili, showing that TfpW was both necessary and sufficient for polymerization of the glycan and its transfer to pilins. Parallel experiments in *Escherichia coli* showed that additional components – including TfpX – were needed for pilin glycosylation in that background. Interactions of TfpW with itself, TfpX, and proteins involved in D-Araf biosynthesis suggest they form a glycosylation complex for efficient pilin modification.

## RESULTS

*tfpW*, but not *tfpX*, is conserved in T4P-encoding species – We observed previously that deletion of *tfpX* caused pilin glycosylation defects. However, bioinformatic analyses showed that while *tfpW* is encoded with *pilA* in multiple species, *tfpX* is rare (**Fig. 1A**). These data support the hypothesis that TfpW is sufficient for pilin glycosylation. In species such as *Pseudomonas indica* and *Kingella denitrificans*, the *pilA* and *tfpW* genes are clustered with the D-Araf biosynthetic genes. Putative TfpW homologues from *Azotobacter beijerinckii*, *Acinetobacter venetianus*, *Teredinibacter turnerae*, *P. indica* and *K. denitrificans* have 29.9 to 47.1% identity to TfpW from *P. aeruginosa* PA7 (**Fig. 1B**). The regions conserved among putative TfpW homologs are located next to or in periplasmic loops (14) 1, 2, 3,

4 and 5 as predicted by CCTOP (Constrained Consensus TOPology prediction server) (**Fig. 1B**). Although the sequence similarity of the C-terminal regions is low, Phyre2 analyses predict that all contain TPR domains (15) (data not shown).

*TfpW* contains a proline-rich motif conserved in Emb proteins – *P. aeruginosa* TfpW has limited amino-acid sequence similarity with other oligosaccharyltransferases such as TfpO or PglL, all of which have multiple transmembrane segments followed by a large C-terminal periplasmic domain. In *P. aeruginosa* group I and group IV strains, the genes encoding TfpO and TfpW are located immediately downstream of *pilA* encoding the major pilin, while in *N. meningitidis*, *pglL* and *pilE* (the equivalent of *pilA*) are unlinked (**Fig. 2A**). In *M. tuberculosis* genes the encoding glycosyltransferases AftA and EmbA/B/C that synthesize D-Araf-containing glycans are clustered with genes involved in D-Araf precursor biosynthesis (**Fig. 2A**). No *emb*-like genes were identified in *P. aeruginosa*, and the presence of a DDX motif characteristic of GT-C family enzymes in TfpW suggested that it could have glycosyltransferase (forming the  $\alpha$ -1,5 linkages between D-Araf monomers) and oligosaccharyltransferase (transferring D-Araf oligosaccharides to the pilin acceptor) activities. Despite TfpW's limited sequence identity with Emb proteins, a second motif similar to the proline-rich domain in *M. tuberculosis* EmbC (YX<sub>6</sub>PX<sub>5</sub>P) (16) was identified in putative PL4, near the C-terminal TPR domain (**Fig. 2B**). This motif is found in membrane-bound polysaccharide polymerases and regulates polysaccharide chain length (16,17). The YX<sub>6</sub>PFX<sub>7</sub>P sequence was conserved among putative TfpW homologs (**Fig. 1B**).

*Topology of TfpW* - TfpW has 11 predicted transmembrane segments, with a cytoplasmic N-terminus and periplasmic C-terminus. In the absence of a structure, we probed its topology experimentally using dual reporter (PhoA/LacZ $\alpha$ ) fusions at select positions (8). Periplasmic fusions result in blue colonies due to alkaline phosphatase activity, while cytoplasmic fusions yield red

colonies due to  $\beta$ -galactosidase activity. Transmembrane or indeterminate fusions result in purple colonies. Only fusions in the first predicted periplasmic loop and in the large C-terminal domain gave a strong alkaline phosphatase signal (**Fig. 3A**), while fusions to other putative cytoplasmic and periplasmic loops resulted in purple colonies (**Fig. 3A**). One fusion predicted to be located in the membrane (G245) instead resulted in blue colonies, suggesting a periplasmic localization. These data suggest that the configuration of the central portion of the protein does not match *in silico* predictions. We generated a structural model of TfpW using the Phyre2 server (**Fig. 3B and C**). The closest structural template was ArnT, a 4-deoxy-4-aminoarabinose transferase from *Cupriavidus metallidurans*. Most of TfpW was modelled with high confidence up to the C-terminal TPR domain, while the best independent match to TfpW's TPR domain was the C-terminal domain of human O-GlcNAc transferase. Putative TM segments 5 through 8 in the ArnT-based model were distorted, especially in the 180° view (**Fig. 3C**). This result, coupled with our topology data, suggests that the central portion of TfpW has an unusual fold.

*PilA<sub>5196</sub> glycosylation can be reconstituted in PAO1 and E. coli* – To establish whether *pilA*, *tfpW*, and the D-Araf biosynthetic genes are sufficient for PilA<sub>5196</sub> glycosylation in a heterologous system, we introduced constructs encoding various subsets of these genes into *P. aeruginosa* PAO1 (which lacks the genes for D-Araf biosynthesis) as well as into *Escherichia coli*. We previously found that loss of *tfpX* prevented pilin glycosylation (5), but its lack of conservation in other species with *tfpW* homologues suggested that it may be dispensable. As *pilA*, *tfpW* and *tfpX* are co-transcribed, we wondered if deletion of *tfpX* was detrimental to transcript stability. We generated *pilA-tfpWX* constructs with a frameshift mutation at Glu16 of TfpX (expressing only first 15 amino acids) or a stop codon at Leu56. In both cases, pilins were still modified in the PAO1 background (**Fig. 4A**), suggesting that TfpX is not required. Instead, deletion of *tfpX* (AW, **Fig. 4A**)

likely disrupts TfpW expression. Interestingly, TfpX expression was necessary for pilin glycosylation in *E. coli*, since no modification was observed using the construct with a frameshift mutation at Glu16 (**Fig. 4B**). *E. coli* lacks the machinery for surface assembly of *P. aeruginosa* pilins, but we could still monitor pilin expression and post-translational modification by Western blot of cell lysates using specific antibodies. In addition to TfpX, we found that 6247 – a hypothetical protein that shares ~59-63% sequence identity with GtrA proteins from other bacteria – plus 6246, DprE1 and DprE2 were required for PilA<sub>5196</sub> glycosylation in *E. coli* (**Fig. 4C**). Members of the GtrA family are involved in the synthesis of cell surface polysaccharides (18).

GtrA-like component 6247 has three predicted transmembrane domains, a periplasmic N-terminus, cytoplasmic C-terminus, and pI of 9.24 (Expasy Bioinformatic Resource Portal). A similar configuration and isoelectric point are predicted for GtrA family member Rv3789 from *M. tuberculosis* (18) despite their lack of sequence similarity.

*ArnE/F, an undecaprenyl phosphate aminoarabinose flippase may participate in pilin glycosylation in P. aeruginosa when 6247 is absent* – A study in *M. smegmatis*  $\Delta$ Rv3789 strains showed that the reduced arabinose content of AG and LAM and accumulation of decaprenyl-monophosphoryl- $\beta$ -D-arabinose (DPA) were restored upon complementation with the putative undecaprenyl phosphate aminoarabinose flippase *arnE/F* genes from *E. coli*, suggesting that both Rv3789 and ArnE (PmrM)/ArnF (PmrL) promote D-Araf translocation (19). To investigate whether ArnE/F can function in *P. aeruginosa* pilin glycosylation, a PAO1  $\Delta$ *arnE/F* mutant was constructed and complemented with pBADGr-AWX plus pUCP20- $\emptyset$  (empty vector), or pUCP20 with 6245-6251, 6246-6249, or 6246-6249 containing a 6247 deletion. Western blot of whole cell lysates was performed using a PilA<sub>5196</sub> antibody. Deletion of *arnE/F* had no effect on pilin glycosylation when 6245-6251 were expressed (**Fig. 5A and B**). AWX plus 6246, 6248 and 6249 are the minimum

requirements for pilin glycosylation in PAO1 (**Fig. 5A**), as observed previously (9). However, loss of 6247 expression in PAO1  $\Delta$ arnE/F decreased pilin glycosylation (**Fig. 5A and B**), suggesting that ArnE/F may participate in pilin glycosylation when 6247 is absent and confirming the results seen in *M. tuberculosis*.

*TfpW interacts with itself, TfpX and proteins involved in D-Araf biosynthesis* – In mycobacteria genes encoding DPA synthesis are clustered with those encoding the Emb glycosyltransferases, while in *P. aeruginosa* the pilin and sugar biosynthetic gene clusters are unlinked. We asked whether the products of the two *P. aeruginosa* gene clusters could form a protein complex to promote efficient pilin glycosylation. Potential interactions were tested using a bacterial adenylate cyclase two-hybrid (BACTH) assay (20). T18-TfpW, -TfpX, -6247, -DprE1 and -DprE2 C-terminal fusions were co-expressed in *E. coli* BTH101 with T25-TfpW, -TfpX, -6247, -DprE1 and -DprE2 C-terminal fusions, and potential interactions were monitored on LB agar containing X-Gal or MacConkey agar containing maltose. TfpW interacted with itself, TfpX, 6247, and DprE2, while 6247 interacted with itself, TfpX, DprE1, and DprE2 (**Fig. 6**). Interaction of DprE1 and DprE2, previously demonstrated in mycobacteria (21), was also confirmed (**Fig. 6**). These data suggest that despite being encoded in separate operons, the pilin glycosylation proteins may form a complex.

*P. aeruginosa Pa5196 DprE1 is cytoplasmic* – A recent study suggested that DprE1 is a highly-accessible drug target due its localization to the periplasmic face of the cytoplasmic membrane of *M. tuberculosis* (22). Periplasmic DPA biosynthesis would preclude the need for a translocase (flippase). The DprE1 proteins of *M. tuberculosis* and *P. aeruginosa* share 33% identity, but neither has a secretion signal, making us skeptical of a non-cytoplasmic localization. We generated a C-terminal fusion of superfolder GFP (sGFP) to *P. aeruginosa* DprE1, co-expressed the fusion with control protein PilE-mCherry in *E. coli* DH5 $\alpha$  and in Pa5196  $\Delta$ dprE1,

and examined localization of the fusions by fluorescence microscopy. PilE is a T4P minor pilin that localizes to the inner membrane with its C-terminus in the periplasm, resulting in circumferential fluorescence (23). While PilE-mCherry showed the expected pattern of fluorescence, the *P. aeruginosa* DprE1-sGFP fusion showed diffuse localization in both *E. coli* and Pa5196 strains, consistent with cytoplasmic expression (**Fig. 7A and B**). This result, coupled with the BACTH interaction data, suggests that precursor biosynthesis is likely mediated by a cytoplasmic biosynthetic complex.

## DISCUSSION

TfpW is an unusual protein with features of both glycosyltransferases and oligosaccharyltransferases. TfpW and its homologues have conserved DDX (5) and proline-rich motifs (YX<sub>6</sub>PFX<sub>7</sub>P) (**Fig. 1B and 2B**). The proline-rich motif is found in membrane-bound polysaccharide polymerases including EmbA/B/C (*M. tuberculosis*), ExoP (*Sinorhizobium meliloti*), CtrB (*N. meningitidis*), WzzB (*Salmonella typhimurium*) and WzzE (*E. coli*), and regulates polysaccharide chain length (16,17). W627L and W627L/P635S/P641S mutations in the proline-rich motif of EmbC from *M. smegmatis* resulted in LAM polymers with shorter arabinan chains, confirming a role in chain-length regulation (16). The periplasmic location of TfpW's DDX motif and TPR domains were supported by our topology studies (**Fig. 3A**) but fusions to other predicted periplasmic loops gave indeterminate signals. Alexeyev and Winkler reported that blue and purple colonies can result from PhoA/LacZ $\alpha$  fusions to periplasmic domains and adjacent transmembrane regions (24). Structural studies will be necessary to validate the conformation of TfpW, particularly the central region of the protein.

The D-Araf biosynthetic enzymes minimally required for modification of PilA<sub>5196</sub> in the PAO1 background were 6246, DprE1 and DprE2 (9), while TfpX was dispensable (**Fig. 4A**). These data suggest that TfpW alone may polymerize  $\alpha$ -1,5-D-Araf glycans and transfer them

to pilins. This finding is consistent with the lack of TfpX homologues in most species that encode TfpW homologues. However, TfpX was required for pilin glycosylation in *E. coli* (**Fig. 4B and C**), possibly explaining why it has been retained in some species. TfpX is a protein of unknown function with ~50% amino acid sequence similarity to TfpY and TfpZ from group III and V strains of *P. aeruginosa*, respectively (25). Loss of those components reduces pilus assembly in an unknown manner.

GtrA-like protein 6247 shares of the properties of Rv3789 from *M. tuberculosis* despite lack of sequence similarity. GtrA family members are involved in the synthesis of cell surface polysaccharides (18). Rv3789 was initially proposed to be a flippase responsible for translocation of DPA across the cytoplasmic membrane, due to a reduction in the arabinose content of both AG and LAM and accumulation of DPA in *M. smegmatis* mutants that were restored upon complementation with *E. coli* *arnE/F* (19). ArnE and ArnF form a heterodimer to transport undecaprenyl phosphate- $\alpha$ -4-amino-4-deoxy-L-arabinose (L-Ara4N) to the outer surface of the inner membrane (26). Then, ArnT, an integral membrane glycosyltransferase, modifies the lipid A moiety of LPS with L-Ara4N, reducing its negative charge to minimize interaction with polymyxin and cationic antimicrobial peptides (27). The L-Ara4N pathway is a major contributor to antibiotic resistance in many species, including *P. aeruginosa* (7).

Based on the ability of ArnE/F to replace Rv3789 from *M. tuberculosis* (19), they have relaxed substrate specificities regarding both oligosaccharide and lipid moieties (26). In *P. aeruginosa*, deletion of *arnE/F* had no effect on pilin glycosylation when AWX and 6245-6251 were expressed (**Fig. 5A and B**). However, in PAO1  $\Delta$ *arnE/F* loss of 6247 expression decreased pilin glycosylation, suggesting that these genes may have a role when 6247 is absent. Since some pilin glycosylation was still observed when both ArnE/F and 6247 were missing (**Fig. 5B**), it is unlikely that

these proteins are responsible for D-Araf translocation.

Interaction of Rv3789 with arabinosyltransferase AftA was suggested to be consistent with Rv3789 acting as a hub for other enzymes involved in DPA biosynthesis (18). Kolly et al. argued that the structural model of Rv3789 was inconsistent with a flippase activity, while its positive charge at neutral pH (pI=10.4) could facilitate the recruitment of partner proteins (18). Deletion of the Rv3789 homologue 6247 in PAO1 decreased the abundance of highly glycosylated species (9) but 6247 expression was not essential for pilin glycosylation. Our BACTH data supports a role for 6247 as a potential hub protein that interacts with TfpW, TfpX, DprE1 and DprE2 to enable efficient pilin glycosylation (**Fig. 6**). Our DprE1 localization data suggest that the precursor is synthesized in the cytoplasm, although no specific translocase/flippase candidate was identified. From our data, we propose a model of Pa5196 pilin glycosylation, in which a dimer of 6247 interacts with cytoplasmic DprE1 and DprE2 enzymes (**Fig. 8**). 6247 also recruits TfpX and TfpW to form a glycosylation complex (**Fig. 8**). With its limited similarity to glycan flippases, TfpW might be a trifunctional enzyme that translocates the lipid-linked precursor to the periplasmic face of the membrane, polymerizes it into  $\alpha$ -1,5-linked-D-arabinofuranose polymers via its periplasmic DDX motif with lengths dictated by the proline-rich motif, then transfers the polymers to multiple Ser and Thr residues of PilA (**Fig. 8**). TfpX and the GtrA-like 6247 protein may be necessary to stabilize the pilin glycosylation complex in *E. coli*. This latter result suggests that ArnE/F may compensate for 6247 in *P. aeruginosa*, while the *E. coli* homologues might be unable to do so.

In summary, these data suggest that GtrA-like protein 6247 acts as a hub protein and forms a glycosylation complex with TfpW, TfpX and proteins involved in D-Araf biosynthesis for efficient pilin glycosylation. TfpW may be the first example of a trifunctional flippase, polymerase and glycosyltransferase. Further studies are necessary

to investigate the function of TfpW as a D-Araf translocase.

## EXPERIMENTAL PROCEDURES

### *Bacterial strains and growth conditions* –

Bacterial strains and plasmids used in this work are listed in **Table 1**, and oligonucleotide primer sequences are listed in **Table 2**. *E. coli* and *P. aeruginosa* were grown at 37 °C in Luria-Bertani (LB) broth or on LB agar plates (1.5% agar) supplemented with the following antibiotics when required: 100 µg ml<sup>-1</sup> ampicillin, 50 µg ml<sup>-1</sup> kanamycin, 15 µg ml<sup>-1</sup> gentamicin for *E. coli* and 30 µg ml<sup>-1</sup> for *P. aeruginosa*. L-arabinose was added to induce expression from pBADGr *ara* promoter at concentrations of 0.2% for complementation of *E. coli* and 0.02% or 0.05% for *P. aeruginosa*. Plasmids were transformed by heat shock into *E. coli* competent cells, and by electroporation into *P. aeruginosa* cells. Standard PCR and cloning techniques were used to generate complementation constructs as listed in **Table 1**. Restriction, DNA polymerase and DNA ligase enzymes were from Thermo Scientific and were used according to manufacturer's recommendation. All constructs were verified by DNA sequencing (MOBIX McMaster University). Bacterial strains were stored at -80 °C in LB containing 15% glycerol.

*Bioinformatic analysis* – TfpW putative homologs were identified through a BLASTP search (<https://blast.ncbi.nlm.nih.gov/>). Amino acid sequence alignments were performed using ClustalW and GONNET algorithm (<https://npsa-prabi.ibcp.fr>). Topology predictions were done using CCTOP (Constrained Consensus Topology prediction server) that uses 10 different topology prediction methods and incorporates information available in the PDBTM, TOPDB and TOPDOM databases using hidden Markov model (28). Structure predictions were carried out using Phyre2 web portal for protein modeling, prediction and analysis (15).

*Construction of PhoA-LacZa fusions and topology studies* – The *phoA-lacZa* reporter sequence was amplified from pPLE01 (8) and cloned into pUCP20 using PstI and HindIII enzyme

restriction sites. Targeted fusions for *tfpW* gene were created by amplifying various 3' truncation positions from *P. aeruginosa* Pa5196 genomic DNA and cloning upstream of *phoA-lacZa* in pUCP20 using BamHI and PstI sites. Constructions were transformed into *E. coli* DH5a competent cells (α-complementing host strain) and plated on LB agar containing ampicillin (100 µg ml<sup>-1</sup>), isopropyl-β-D-thiogalactopyranoside (IPTG, 1 mM), 5-bromo-4-chloro-3-indolyl phosphate (BCIP, 80 µg ml<sup>-1</sup>), and 6-chloro-3-indolyl-β-D-galactoside (Red-Gal, 100 µg ml<sup>-1</sup>). Plates were incubated at 37 °C overnight. Colony colors represent the cellular localization of a given truncation: blue, periplasm (AP activity); red, cytoplasm (BG activity); and purple, transmembrane (combination of AP and BG activities). Three independent experiments were performed.

*Preparation of whole cell lysates* – *E. coli* and *P. aeruginosa* strains were grown on LB agar plates overnight at 37 °C. Cells were scraped and resuspended in 1X PBS to an OD<sub>600</sub> of 0.5 for *E. coli* or 0.1 for *P. aeruginosa* strains, and 1 ml was centrifuged at 13400 x g for 3 min. The cell pellet was resuspended in 100 µl of 1X SDS-PAGE loading buffer (50 mM Tris HCl pH 6.8, 100 mM DTT, 2% (w/v) SDS, 0.1% (w/v) bromophenol blue and 10% glycerol).

*SDS-PAGE and Western blot analyses* – Samples were boiled at 100 °C for 10 min and separated on 15% SDS-PAGE at 150 V for 1 h. Proteins were transferred to nitrocellulose membrane for 1 h at 225 mA. Membranes were blocked with 5% skim milk powder in 1X PBS shaking for 1 h at room temperature and were incubated with primary antibodies for 16 h at room temperature. Anti-PilA<sub>IV</sub> (rabbit number 286, 1:5000 dilution in 1X PBS) was used for detection of pilins. Membranes were washed three times with 1X PBS for 5 min and incubated with goat anti-rabbit IgG-alkaline phosphatase-conjugate secondary antibody (Bio-Rad, 1:3000 dilution) for 1 h at room temperature. Membranes were washed three times with 1X PBS for 5 min and developed with nitro blue tetrazolium/5-bromo-4-chloro-3-

indolyl phosphate in alkaline phosphatase buffer (Bio-Rad).

*Generation of arnE/F mutant of PAO1* - Primers were designed to amplify approximately 800 bp fragments corresponding to regions upstream and downstream of the *arnE/F* genes (Table 2). After digestion with restriction enzymes, upstream (KpnI and BamHI) and downstream (BamHI and HindIII) fragments were sequentially cloned into the suicide vector pEX18Gm (29). *E. coli* SM10 was transformed with the constructs and they were transferred to PAO1 by biparental mating as described previously (29). PAO1 recombinant strains were selected on *Pseudomonas* Isolation Agar (PIA, BD) containing 100 µg ml<sup>-1</sup> gentamicin. PAO1 mutants were selected on LB agar containing 5% sucrose and were gentamicin-sensitive. Deletion of *arnE/F* genes was verified by PCR using screening primers (Table 2).

*Bacterial adenylate cyclase two-hybrid assay* - The *tfpW*, *tfpX*, 6247, 6248 and 6249 genes were amplified by PCR from Pa5196 genomic DNA and cloned into both pUT18C and pKT25 plasmids using restriction enzymes. The pUT18C and pKT25 plasmids express T18 and T25 domains of adenylate cyclase, respectively. Competent *E. coli* BTH 101 cells were co-transformed with derivatives of both plasmids and plated on MacConkey agar supplemented with 1% maltose, 0.5 mM IPTG, 100 µg ml<sup>-1</sup> ampicillin, 50 µg ml<sup>-1</sup> kanamycin, and on LB agar supplemented with 40 µg ml<sup>-1</sup> 5-bromo-4-chloro-3-indolyl-β-D-galactopyranoside (X-Gal), 0.5 mM IPTG, 100 µg ml<sup>-1</sup> ampicillin, 50 µg ml<sup>-1</sup> kanamycin, and incubated at 25 °C for 24-48 h. Three independent experiments were performed.

*Fluorescence microscopy* - The *dprE1* (6248) gene fused to sGFP C-terminal tag was cloned into pUCP20 and transformed in DH5α *E. coli* and in Pa5196 Δ *dprE1* strains. Strains were also transformed with pBADGr-*pilE*-mCherry construct (23) and plate into LB agar containing 15 µg ml<sup>-1</sup> gentamicin and 100 µg ml<sup>-1</sup> ampicillin (*E. coli*) or 30 µg ml<sup>-1</sup> gentamicin and 200 µg ml<sup>-1</sup> carbenicillin (*P. aeruginosa*) containing 0.02% L-arabinose. Bacteria were spotted on a 1% agarose pad supplemented with 0.02% L-arabinose on a microscope slide and incubated at 37°C for 2-4 hours. The agarose pad was mounted with a glass coverslip directly prior to imaging. Cells were imaged using brightfield and fluorescence microscopy on a Nikon A1 confocal microscope through a Plan Apo 60X (NA=1.40) oil objective. Image acquisition was done using Nikon NIS-Elements Advanced Research (Version 5.11.01 64-bit) software. Where indicated, cells were imaged using an EVOF FL Auto microscope through a Plan Apo 60X (NA=1.40) oil objective in the McMaster Biophotonics Facility. TexasRed and YFP LED filters were used for fluorescence imaging, and transmitted white light was captured with a monochrome camera. Image analysis was completed using ImageJ 1.52K containing the MicrobeJ plugin for fluorescence channel alignment (30).

*Data availability* - All data are contained within the manuscript.

*Acknowledgements* - This work was funded by grants from Glyconet and the Boris Family Foundation.

*Competing Financial Interests* - The authors have no competing financial interests.



## References

1. Waters, C. M., and Goldberg, J. B. (2019) *Pseudomonas aeruginosa* in cystic fibrosis: A chronic cheater. *Proc Natl Acad Sci U S A*
2. Burrows, L. L. (2012) *Pseudomonas aeruginosa* twitching motility: type IV pili in action. *Annu Rev Microbiol* **66**, 493-520
3. Giltner, C. L., Nguyen, Y., and Burrows, L. L. (2012) Type IV pilin proteins: versatile molecular modules. *Microbiol Mol Biol Rev* **76**, 740-772
4. Kus, J. V., Tullis, E., Cvitkovitch, D. G., and Burrows, L. L. (2004) Significant differences in type IV pilin allele distribution among *Pseudomonas aeruginosa* isolates from cystic fibrosis (CF) versus non-CF patients. *Microbiology* **150**, 1315-1326
5. Kus, J. V., Kelly, J., Tessier, L., Harvey, H., Cvitkovitch, D. G., and Burrows, L. L. (2008) Modification of *Pseudomonas aeruginosa* Pa5196 type IV Pilins at multiple sites with D-Araf by a novel GT-C family Arabinosyltransferase, TfpW. *J Bacteriol* **190**, 7464-7478
6. Voisin, S., Kus, J. V., Houlston, S., St-Michael, F., Watson, D., Cvitkovitch, D. G., Kelly, J., Brisson, J. R., and Burrows, L. L. (2007) Glycosylation of *Pseudomonas aeruginosa* strain Pa5196 type IV pilins with mycobacterium-like alpha-1,5-linked d-Araf oligosaccharides. *J Bacteriol* **189**, 151-159
7. Olagnon, C., Monjaras Feria, J., Grunwald-Gruber, C., Blaukopf, M., Valvano, M. A., and Kosma, P. (2019) Synthetic Phosphodiester-Linked 4-Amino-4-deoxy-l-arabinose Derivatives Demonstrate that ArnT is an Inverting Aminoarabinosyl Transferase. *Chembiochem* **20**, 2936-2948
8. Islam, S. T., Taylor, V. L., Qi, M., and Lam, J. S. (2010) Membrane topology mapping of the O-antigen flippase (Wzx), polymerase (Wzy), and ligase (WaaL) from *Pseudomonas aeruginosa* PAO1 reveals novel domain architectures. *MBio* **1**
9. Harvey, H., Kus, J. V., Tessier, L., Kelly, J., and Burrows, L. L. (2011) *Pseudomonas aeruginosa* D-arabinofuranose biosynthetic pathway and its role in type IV pilus assembly. *J Biol Chem* **286**, 28128-28137
10. Perez-Riba, A., and Itzhaki, L. S. (2019) The tetratricopeptide-repeat motif is a versatile platform that enables diverse modes of molecular recognition. *Curr Opin Struct Biol* **54**, 43-49
11. Power, P. M., Seib, K. L., and Jennings, M. P. (2006) Pilin glycosylation in *Neisseria meningitidis* occurs by a similar pathway to wzy-dependent O-antigen biosynthesis in *Escherichia coli*. *Biochem Biophys Res Commun* **347**, 904-908
12. Faridmoayer, A., Fentabil, M. A., Haurat, M. F., Yi, W., Woodward, R., Wang, P. G., and Feldman, M. F. (2008) Extreme substrate promiscuity of the *Neisseria* oligosaccharyl transferase involved in protein O-glycosylation. *J Biol Chem* **283**, 34596-34604
13. Faridmoayer, A., Fentabil, M. A., Mills, D. C., Klassen, J. S., and Feldman, M. F. (2007) Functional characterization of bacterial oligosaccharyltransferases involved in O-linked protein glycosylation. *J Bacteriol* **189**, 8088-8098
14. West, S. E., Schweizer, H. P., Dall, C., Sample, A. K., and Runyen-Janecky, L. J. (1994) Construction of improved *Escherichia-Pseudomonas* shuttle vectors derived from pUC18/19 and sequence of the region required for their replication in *Pseudomonas aeruginosa*. *Gene* **148**, 81-86
15. Kelley, L. A., Mezulis, S., Yates, C. M., Wass, M. N., and Sternberg, M. J. (2015) The Phyre2 web portal for protein modeling, prediction and analysis. *Nat Protoc* **10**, 845-858
16. Berg, S., Starbuck, J., Torrelles, J. B., Vissa, V. D., Crick, D. C., Chatterjee, D., and Brennan, P. J. (2005) Roles of conserved proline and glycosyltransferase motifs of EmbC in biosynthesis of lipoarabinomannan. *J Biol Chem* **280**, 5651-5663
17. Berg, S., Kaur, D., Jackson, M., and Brennan, P. J. (2007) The glycosyltransferases of *Mycobacterium tuberculosis* - roles in the synthesis of arabinogalactan, lipoarabinomannan, and other glycoconjugates. *Glycobiology* **17**, 35-56R
18. Kolly, G. S., Mukherjee, R., Kilacska, E., Abriata, L. A., Raccaud, M., Blasko, J., Sala, C., Dal Peraro, M., Mikusova, K., and Cole, S. T. (2015) GtrA Protein Rv3789 Is Required for Arabinosylation of Arabinogalactan in *Mycobacterium tuberculosis*. *J Bacteriol* **197**, 3686-3697

19. Larrouy-Maumus, G., Skovierova, H., Dhouib, R., Angala, S. K., Zuberogoitia, S., Pham, H., Villela, A. D., Mikusova, K., Noguera, A., Gilleron, M., Valentinova, L., Kordulakova, J., Brennan, P. J., Puzo, G., Nigou, J., and Jackson, M. (2012) A small multidrug resistance-like transporter involved in the arabinosylation of arabinogalactan and lipoarabinomannan in mycobacteria. *J Biol Chem* **287**, 39933-39941
20. Karimova, G., Pidoux, J., Ullmann, A., and Ladant, D. (1998) A bacterial two-hybrid system based on a reconstituted signal transduction pathway. *Proc Natl Acad Sci U S A* **95**, 5752-5756
21. Bhutani, I., Loharch, S., Gupta, P., Madathil, R., and Parkesh, R. (2015) Structure, dynamics, and interaction of Mycobacterium tuberculosis (Mtb) DprE1 and DprE2 examined by molecular modeling, simulation, and electrostatic studies. *PLoS One* **10**, e0119771
22. Brecik, M., Centarova, I., Mukherjee, R., Kolly, G. S., Huszar, S., Bobovska, A., Kilacskova, E., Mokosova, V., Svetlikova, Z., Sarkan, M., Neres, J., Kordulakova, J., Cole, S. T., and Mikusova, K. (2015) DprE1 is a Vulnerable Tuberculosis Drug Target Due to Its Cell Wall Localization. *ACS Chem Biol* **10**, 1631-1636
23. Nguyen, Y., Harvey, H., Sugiman-Marangos, S., Bell, S. D., Buensuceso, R. N., Junop, M. S., and Burrows, L. L. (2015) Structural and functional studies of the Pseudomonas aeruginosa minor pilin, PilE. *J Biol Chem* **290**, 26856-26865
24. Alexeyev, M. F., and Winkler, H. H. (1999) Membrane topology of the Rickettsia prowazekii ATP/ADP translocase revealed by novel dual pho-lac reporters. *J Mol Biol* **285**, 1503-1513
25. Asikyan, M. L., Kus, J. V., and Burrows, L. L. (2008) Novel proteins that modulate type IV pilus retraction dynamics in Pseudomonas aeruginosa. *J Bacteriol* **190**, 7022-7034
26. Yan, A., Guan, Z., and Raetz, C. R. (2007) An undecaprenyl phosphate-aminoarabinose flippase required for polymyxin resistance in Escherichia coli. *J Biol Chem* **282**, 36077-36089
27. Trent, M. S., Ribeiro, A. A., Lin, S., Cotter, R. J., and Raetz, C. R. (2001) An inner membrane enzyme in Salmonella and Escherichia coli that transfers 4-amino-4-deoxy-L-arabinose to lipid A: induction on polymyxin-resistant mutants and role of a novel lipid-linked donor. *J Biol Chem* **276**, 43122-43131
28. Dobson, L., Remenyi, I., and Tusnady, G. E. (2015) CCTOP: a Consensus Constrained TOPology prediction web server. *Nucleic Acids Res* **43**, W408-412
29. Hoang, T. T., Karkhoff-Schweizer, R. R., Kutchma, A. J., and Schweizer, H. P. (1998) A broad-host-range Flp-FRT recombination system for site-specific excision of chromosomally-located DNA sequences: application for isolation of unmarked Pseudomonas aeruginosa mutants. *Gene* **212**, 77-86
30. Schindelin, J., Arganda-Carreras, I., Frise, E., Kaynig, V., Longair, M., Pietzsch, T., Preibisch, S., Rueden, C., Saalfeld, S., Schmid, B., Tinevez, J. Y., White, D. J., Hartenstein, V., Eliceiri, K., Tomancak, P., and Cardona, A. (2012) Fiji: an open-source platform for biological-image analysis. *Nat Methods* **9**, 676-682
31. Jacobs, M. A., Alwood, A., Thaipisuttikul, I., Spencer, D., Haugen, E., Ernst, S., Will, O., Kaul, R., Raymond, C., Levy, R., Chun-Rong, L., Guenther, D., Bovee, D., Olson, M. V., and Manoil, C. (2003) Comprehensive transposon mutant library of Pseudomonas aeruginosa. *Proc Natl Acad Sci U S A* **100**, 14339-14344
32. Gallant, C. V., Daniels, C., Leung, J. M., Ghosh, A. S., Young, K. D., Kotra, L. P., and Burrows, L. L. (2005) Common beta-lactamases inhibit bacterial biofilm formation. *Mol Microbiol* **58**, 1012-1024

**Table 1. Bacterial strains and plasmids**

| Strains or plasmids                 | Description                                                                                                                                                                                                                                                              | Source / Ref.    |
|-------------------------------------|--------------------------------------------------------------------------------------------------------------------------------------------------------------------------------------------------------------------------------------------------------------------------|------------------|
| <b><i>E. coli</i> strains</b>       |                                                                                                                                                                                                                                                                          |                  |
| DH5 $\alpha$                        | F <sup>-</sup> , $\phi$ 80 <i>lacZ</i> , <i>M15</i> , $\Delta$ ( <i>lacZYA-argF</i> ), <i>U169</i> , <i>recA1</i> , <i>endA1</i> , <i>hsdR17</i> ( <i>rk<sup>-</sup>,mk<sup>+</sup></i> ), <i>phoAsupE44</i> , <i>thi-1</i> , <i>gyrA96</i> , <i>relA1</i> , $\lambda$ - | Invitrogen       |
| SM10                                | <i>Km<sup>R</sup></i> , <i>thi-1</i> , <i>thr</i> , <i>leu</i> , <i>tonA</i> , <i>lacY</i> , <i>supE</i> , <i>recA::RP4-2-Tc::Mu</i> , <i>pir</i>                                                                                                                        | (14)             |
| BTH 101                             | F <sup>-</sup> , <i>cya-99</i> , <i>araD139</i> , <i>galE15</i> , <i>galK16</i> , <i>rpsL1</i> ( <i>Str r</i> ), <i>hsdR2</i> , <i>mcrA1</i> , <i>mcrB1</i>                                                                                                              | Euromedex        |
| <b><i>P. aeruginosa</i> strains</b> |                                                                                                                                                                                                                                                                          |                  |
| PAO1                                | Group II type IV pili                                                                                                                                                                                                                                                    | Laboratory stock |
| PAO1NP                              | <i>Tn5-phoA</i> insertion at base 163 in <i>pilA</i>                                                                                                                                                                                                                     | (31)             |
| Pa5196                              | Group IV type four pili; rectal isolate                                                                                                                                                                                                                                  | (4)              |
| Pa5196NP                            | <i>pilA::aacCIFRT</i>                                                                                                                                                                                                                                                    | (5)              |
| Pa5196 $\Delta$ <i>dprE1</i>        | FRT insertion at position 569 (XhoI) in <i>dprE1</i> (PsPA7_6248)                                                                                                                                                                                                        | (9)              |
| <b>Plasmids</b>                     |                                                                                                                                                                                                                                                                          |                  |
| pBADGr                              | L-arabinose-inducible vector, Gm <sup>R</sup>                                                                                                                                                                                                                            | (32)             |
| pUCP20                              | Amp <sup>R</sup> vector used for complementation                                                                                                                                                                                                                         | (29)             |
| pPLE01                              | pBluescript II SK+ with <i>phoA-lacZ<math>\alpha</math></i> from pMA632, Amp <sup>R</sup>                                                                                                                                                                                | (8)              |
| pUT18C                              | Derived from pUC19, p <sub>lac</sub> , Amp <sup>R</sup> , Contains <i>B. pertussis</i> CyaA (225-399) (T18 domain) for N-terminal tagging                                                                                                                                | (20)             |
| pKT25                               | Derived from pSU40, p <sub>lac</sub> , Kan <sup>R</sup> , Contains <i>B. pertussis</i> CyaA (1-224) (T25 domain) for N-terminal tagging                                                                                                                                  | (20)             |
| pEX18Gm                             | Gentamicin-resistant suicide vector used for gene replacement                                                                                                                                                                                                            | (29)             |
| pBADGr-AWX                          | Pa5196 <i>pilA-tfpW-tfpX</i> genes, Gm <sup>R</sup>                                                                                                                                                                                                                      | (9)              |
| pBADGr-AW                           | Pa5196 <i>pilA-tfpW</i> genes, Gm <sup>R</sup>                                                                                                                                                                                                                           | (5)              |
| pBADGr-AWX-X <sup>FS</sup>          | Pa5196 <i>pilA-tfpW-tfpX</i> genes, <i>tfpX</i> contains a frame shift at Glu16 (expressing only aa 1-15), Gm <sup>R</sup>                                                                                                                                               | This study       |
| pBADGr-AWX-X <sup>SC</sup>          | Pa5196 <i>pilA-tfpW-tfpX</i> genes, <i>tfpX</i> contains a stop codon at Leu56, Gm <sup>R</sup>                                                                                                                                                                          | (5)              |
| pBADGr- <i>pilE</i> -mCherry        | PAO1 <i>pilE</i> gene fused to C-terminal mCherry fluorescent tag                                                                                                                                                                                                        | (23)             |
| pUCP20-6245-51                      | <i>PsPA7 6245-51</i> genes, Amp <sup>R</sup>                                                                                                                                                                                                                             | (9)              |
| pUCP20-6246-49                      | <i>PsPA7 6246-49</i> genes, Amp <sup>R</sup>                                                                                                                                                                                                                             | (9)              |
| pUCP20-6247-51                      | <i>PsPA7 6247-51</i> genes, Amp <sup>R</sup>                                                                                                                                                                                                                             | (9)              |
| pUCP20-6245-49, 6247::GmFRT         | <i>PsPA7 6245-49</i> genes, 47 deletion, Amp <sup>R</sup>                                                                                                                                                                                                                | (9)              |

|                                                       |                                                                                                                                |            |
|-------------------------------------------------------|--------------------------------------------------------------------------------------------------------------------------------|------------|
| pUCP20-6246-49,<br>6247::GmFRT                        | <i>PsPA7 6246-49</i> genes, 47 deletion, Amp <sup>R</sup>                                                                      | (9)        |
| pUCP20- <i>tfpW</i> <sup>S64</sup> <i>phoA-lacZa</i>  | <i>tfpW</i> <sup>S64</sup> (encoding aa 1-64) fused to <i>phoA-lacZa</i> , Amp <sup>R</sup>                                    | This study |
| pUCP20- <i>tfpW</i> <sup>T122</sup> <i>phoA-lacZa</i> | <i>tfpW</i> <sup>T122</sup> (encoding aa 1-122) fused to <i>phoA-lacZa</i> , Amp <sup>R</sup>                                  | This study |
| pUCP20- <i>tfpW</i> <sup>K175</sup> <i>phoA-lacZa</i> | <i>tfpW</i> <sup>K175</sup> (encoding aa 1-175) fused to <i>phoA-lacZa</i> , Amp <sup>R</sup>                                  | This study |
| pUCP20- <i>tfpW</i> <sup>C185</sup> <i>phoA-lacZa</i> | <i>tfpW</i> <sup>C185</sup> (encoding aa 1-185) fused to <i>phoA-lacZa</i> , Amp <sup>R</sup>                                  | This study |
| pUCP20- <i>tfpW</i> <sup>L195</sup> <i>phoA-lacZa</i> | <i>tfpW</i> <sup>L195</sup> (encoding aa 1-195) fused to <i>phoA-lacZa</i> , Amp <sup>R</sup>                                  | This study |
| pUCP20- <i>tfpW</i> <sup>L204</sup> <i>phoA-lacZa</i> | <i>tfpW</i> <sup>L204</sup> (encoding aa 1-204) fused to <i>phoA-lacZa</i> , Amp <sup>R</sup>                                  | This study |
| pUCP20- <i>tfpW</i> <sup>E213</sup> <i>phoA-lacZa</i> | <i>tfpW</i> <sup>E213</sup> (encoding aa 1-213) fused to <i>phoA-lacZa</i> , Amp <sup>R</sup>                                  | This study |
| pUCP20- <i>tfpW</i> <sup>G222</sup> <i>phoA-lacZa</i> | <i>tfpW</i> <sup>G222</sup> (encoding aa 1-222) fused to <i>phoA-lacZa</i> , Amp <sup>R</sup>                                  | This study |
| pUCP20- <i>tfpW</i> <sup>N232</sup> <i>phoA-lacZa</i> | <i>tfpW</i> <sup>N232</sup> (encoding aa 1-232) fused to <i>phoA-lacZa</i> , Amp <sup>R</sup>                                  | This study |
| pUCP20- <i>tfpW</i> <sup>G245</sup> <i>phoA-lacZa</i> | <i>tfpW</i> <sup>G245</sup> (encoding aa 1-245) fused to <i>phoA-lacZa</i> , Amp <sup>R</sup>                                  | This study |
| pUCP20- <i>tfpW</i> <sup>A257</sup> <i>phoA-lacZa</i> | <i>tfpW</i> <sup>A257</sup> (encoding aa 1-257) fused to <i>phoA-lacZa</i> , Amp <sup>R</sup>                                  | This study |
| pUCP20- <i>tfpW</i> <sup>V270</sup> <i>phoA-lacZa</i> | <i>tfpW</i> <sup>V270</sup> (encoding aa 1-270) fused to <i>phoA-lacZa</i> , Amp <sup>R</sup>                                  | This study |
| pUCP20- <i>tfpW</i> <sup>L281</sup> <i>phoA-lacZa</i> | <i>tfpW</i> <sup>L281</sup> (encoding aa 1-281) fused to <i>phoA-lacZa</i> , Amp <sup>R</sup>                                  | This study |
| pUCP20- <i>tfpW</i> <sup>Q293</sup> <i>phoA-lacZa</i> | <i>tfpW</i> <sup>Q293</sup> (encoding aa 1-293) fused to <i>phoA-lacZa</i> , Amp <sup>R</sup>                                  | This study |
| pUCP20- <i>tfpW</i> <sup>R333</sup> <i>phoA-lacZa</i> | <i>tfpW</i> <sup>R333</sup> (encoding aa 1-333) fused to <i>phoA-lacZa</i> , Amp <sup>R</sup>                                  | This study |
| pUCP20- <i>tfpW</i> <sup>G646</sup> <i>phoA-lacZa</i> | <i>tfpW</i> <sup>G646</sup> (encoding aa 1-646) fused to <i>phoA-lacZa</i> , Amp <sup>R</sup>                                  | This study |
| pUCP20-6248-sGFP                                      | Pa5196 6248 gene fused to C-terminal superfolder-GFP fluorescent tag                                                           | This study |
| pEX18Gm- <i>arnE/F</i> -UP-DW                         | <i>arnE/F</i> knock-out construct comprising 815 bp of <i>arnE</i> upstream region and 863 bp of <i>arnF</i> downstream region | This study |
| pKT25- <i>tfpW</i>                                    | BACTH plasmid expressing TfpW with an N-terminal T25 tag                                                                       | This study |
| pKT25- <i>tfpX</i>                                    | BACTH plasmid expressing TfpX with an N-terminal T25 tag                                                                       | This study |
| pKT25-6247                                            | BACTH plasmid expressing 6247 with an N-terminal T25 tag                                                                       | This study |
| pKT25-6248                                            | BACTH plasmid expressing 6248 with an N-terminal T25 tag                                                                       | This study |
| pKT25-6249                                            | BACTH plasmid expressing 6249 with an N-terminal T25 tag                                                                       | This study |
| pUT18C- <i>tfpW</i>                                   | BACTH plasmid expressing TfpW with an N-terminal T18 tag                                                                       | This study |
| pUT18C- <i>tfpX</i>                                   | BACTH plasmid expressing TfpX with an N-terminal T18 tag                                                                       | This study |
| pUT18C-6247                                           | BACTH plasmid expressing 6247 with an N-terminal T18 tag                                                                       | This study |
| pUT18C-6248                                           | BACTH plasmid expressing 6248 with an N-terminal T18 tag                                                                       | This study |
| pUT18C-6249                                           | BACTH plasmid expressing 6249 with an N-terminal T18 tag                                                                       | This study |

**Table 2. Oligonucleotide primer sequences**

| Primer name                    | Oligonucleotide sequence (5'-3')*     |
|--------------------------------|---------------------------------------|
| TfpW_F_BamHI                   | TTTTGGATCCAAGGAAGTCTTTATGAAGTCTCTGTG  |
| TfpW <sup>G646</sup> _R1_PstI  | TTTTCTGCAGTCCCTGCCTCGCTTCACTTT        |
| TfpW <sup>S64</sup> _R2_PstI   | TTTTCTGCAGGGAGAGAACCTTCCAGCTTA        |
| TfpW <sup>E213</sup> _R3_PstI  | TTTTCTGCAGCTCTTTCGCCAACCACAGG         |
| TfpW <sup>Q293</sup> _R4_PstI  | TTTTCTGCAGCTGAAATGGCAGGAAACTCTGC      |
| TfpW <sup>L204</sup> _R5_PstI  | TTTTCTGCAGCAAGACAGGAAAGACGATACC       |
| TfpW <sup>G222</sup> _R6_PstI  | TTTTCTGCAGTCCCTCCCGCTGCGTAGAG         |
| TfpW <sup>L281</sup> _R7_PstI  | TTTTCTGCAGCAACGTCTCCAAGGGAAGA         |
| TfpW <sup>T122</sup> _R9_PstI  | TTTTCTGCAGGGTATGCCTGGCTAGGGTG         |
| TfpW <sup>K175</sup> _R10_PstI | TTTTCTGCAGCTTGATGTCCGCCAGATAAACG      |
| TfpW <sup>I257</sup> _R11_PstI | TTTTCTGCAGGATTCCGCCAGCGGAGTG          |
| TfpW <sup>R333</sup> _R12_PstI | TTTTCTGCAGCCGATATAACGCCTGATAAATAACCG  |
| TfpW <sup>C185</sup> _R13_PstI | TTTTCTGCAGGCAGAGCAAGAAGGCACG          |
| TfpW <sup>L195</sup> _R14_PstI | TTTTCTGCAGTTTACTCAGCAGGGCGCC          |
| TfpW <sup>N232</sup> _R15_PstI | TTTTCTGCAGATTTCTGAAAAGCGCCTGGAC       |
| TfpW <sup>G245</sup> _R16_PstI | TTTTCTGCAGGCCGAAGGCAGTGATTATCAG       |
| TfpW <sup>V270</sup> _R17_PstI | TTTTCTGCAGAACATCTGCTATATAGGAAAGTCCA   |
| phoA_lacZa_F_PstI              | TTTTCTGCAGGTTCTGGAAAACCGGGCTG         |
| phoA_lacZa_R_HindIII           | TTTTAAGCTTCCATTCGCCATTCAGGCTG         |
| ArnE/F_UP_F_KpnI               | TTTTGGTACCTTCCTGGCGCTATGGCTG          |
| ArnE/F_UP_R_BamHI              | TTTTGGATCCGAGGCCGGTCATGAGCAG          |
| ArnE/F_DW_F_BamHI              | TTTTGGATCCTTGACCGTCAACGCCCG           |
| ArnE/F_DW_R_HindIII            | TTTTAAGCTTGAAGCAGGAGCCGCCGTAG         |
| ArnEF_Scr_F1                   | GGTTCTACCTGCCGTTGCT                   |
| ArnEF_Scr_R1                   | GTGCTTTCCTCGACGGATGA                  |
| ArnEF_Scr_F2                   | CACCTGCTCATGACCGG                     |
| ArnEF_Scr_R2                   | TTGATCGCTTCCACTGCCTG                  |
| TfpW_BACTH_F_BamHI             | TTTTGGATCCCATGAAGTCTCTGTGGGTATATCTTCA |
| TfpW_BACTH_R_KpnI              | TTTTGGTACCTCATCCCTGCCTCGCTTC          |
| TfpX_BACTH_F_BamHI             | TTTTGGATCCCATGAGGCTGGCTTCTTTTGA       |
| TfpX_BACTH_R_KpnI              | TTTTGGTACCTTAGACTAATTCCGGCAACATTTCC   |
| 6247_BACTH_F_BamHI             | TTTTGGATCCCATGAAGCTGGCCCTGATCTA       |
| 6247_BACTH_R_KpnI              | TTTTGGTACCTCAGGTATCCGCCATGCC          |
| 6248_BACTH_F_BamHI             | TTTTGGATCCCATGGAAGTCTTCGGCTGGG        |
| 6248_BACTH_R_KpnI              | TTTTGGTACCTCAGTCCAGACCCAGGCG          |
| 6249_BACTH_F_XbaI              | TTTTTCTAGAGATGAAAAAGATCCTGATCGTCCG    |
| 6249_BACTH_R_SmaI              | TTTTCCCGGGTTCAGAGGCTCAGCTTCTTGA       |
| 6248_sGFP_F_SacI               | TTTTGAGCTCATGGAAGTCTTCGGCTGGG         |
| 6248_sGFP_R_BamHI              | TTTTGGATCCGTCCAGACCCAGGCGGC           |
| PilA5196_F_EcoRI               | TTTTGAATTCATGAAAGCGCAAAAAGGCTT        |
| PilA5196_R_HindIII             | TTTTAAGCTTTTACGGCTTGCAAGCGTTC         |

\* recognition site of restriction enzymes is underlined and SDM codons are highlighted in bold.

## Figures legends:

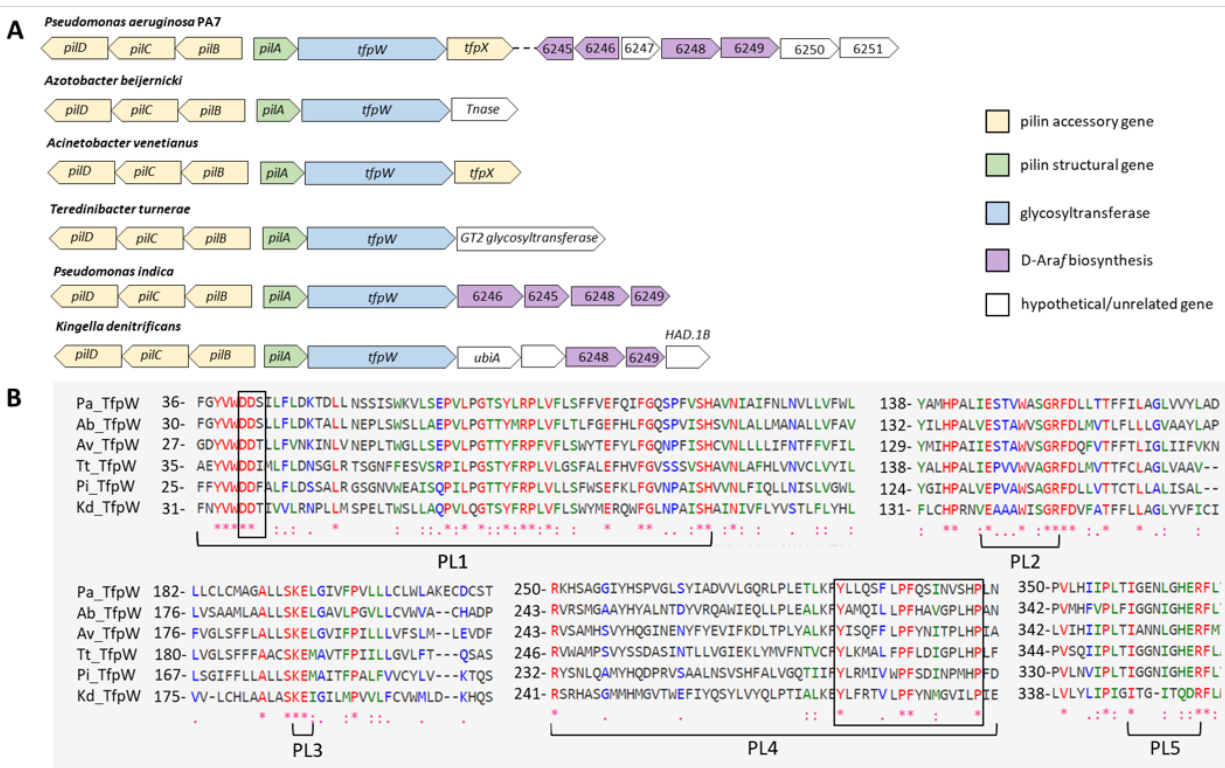

**Figure 1. Genomic organization of *tfpW* from *P. aeruginosa* PA7 and putative homologs from different bacterial species (A), and selected regions of amino acid sequence alignment (B). A. The *tfpW* is located downstream to *pilA* in all bacterial species, but *tfpX* is not. In *P. indica* and *K. denitrificans* the genes encoding the biosynthesis of D-Araf are clustered with the *pilA* and *tfpW* genes. B. The conserved regions among the putative TfpW homologs are located next to or on the predicted periplasmic loops (14) 1, 2, 3, 4 and 5. The conserved DDX domain is located on PL1, while the proline-rich domain (YX<sub>6</sub>PFX<sub>7</sub>P) is located on PL4 (boxed). Pa, *Pseudomonas aeruginosa* PA7 (GenBank accession number AAM52060.1); Ab, *Azotobacter beijerinckii* (WP\_090729738.1); Av, *Acinetobacter venetianus* (WP\_130134296.1); Tt, *Teredinibacter turnerae* (WP\_028883051.1); Pi, *Pseudomonas indica* (WP\_139198627.1); Kd, *Kingella denitrificans* (STR11763.1). Position of the first amino acid in the alignment is indicated before each selected sequence.**

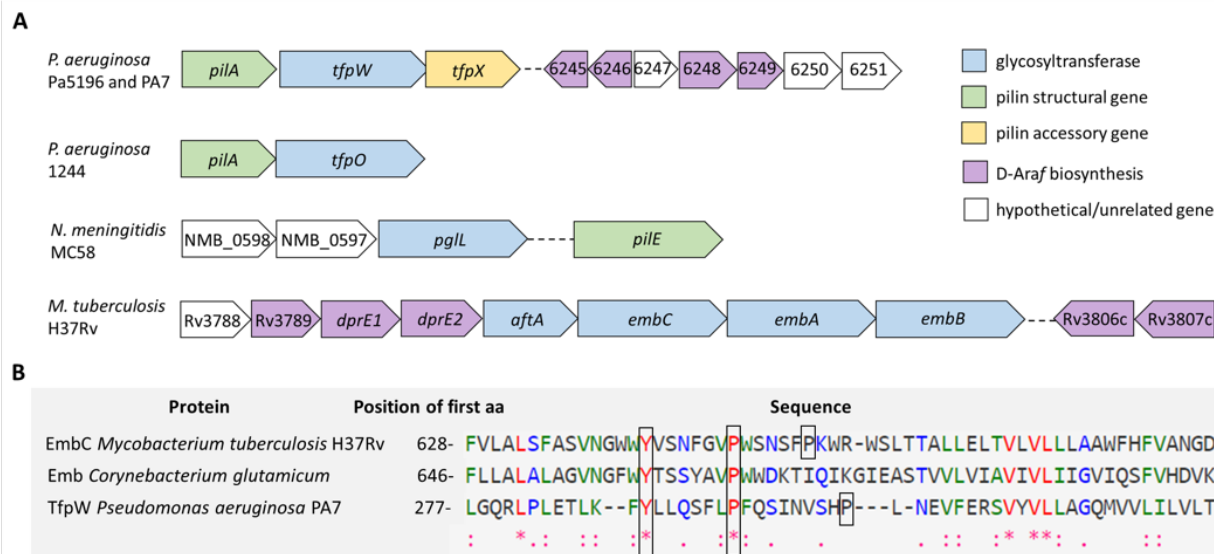

**Figure 2. Genomic organization of pilin glycosyltransferases-encoded genes in *P. aeruginosa* PA7, 1244, *N. meningitidis* and arabinosyltransferases-encoded genes in *M. tuberculosis* H37Rv (A), and selected region of amino acid sequence alignment of EmbC from *M. tuberculosis* H37Rv, Emb from *Corynebacterium glutamicum* and TfpW (B). A. In *P. aeruginosa* PA7 and 1244, the genes that encode glycosyltransferases *tfpW* and *tfpO*, respectively, are located downstream of *pilA*, while in *N. meningitidis* *pglL* and *pilE* are unlinked. In *M. tuberculosis* the genes that encode for glycosyltransferases *aftA* and *embCAB* are clustered with a subset of the genes involved in D-Araf biosynthesis. B. A motif similar to the proline-rich domain found in EmbC from *M. tuberculosis* (YX<sub>6</sub>PX<sub>5</sub>P) is present in TfpW (YX<sub>6</sub>PFX<sub>7</sub>P).**

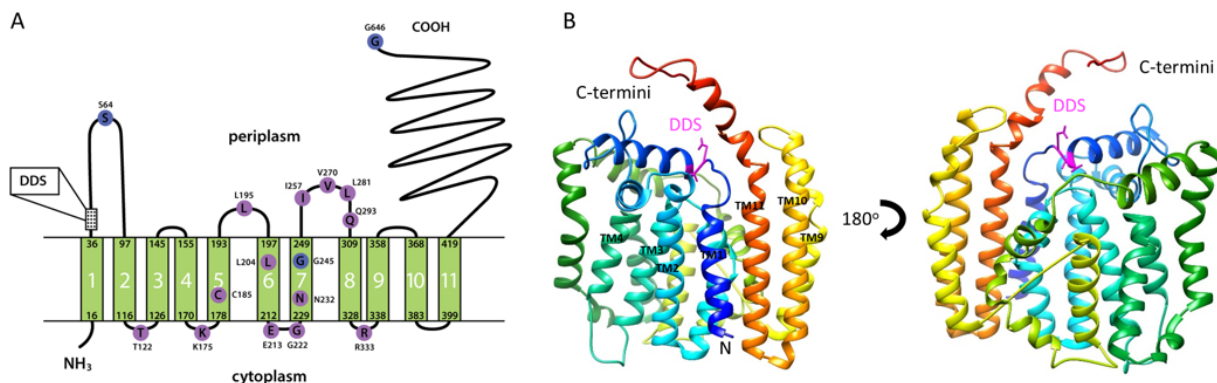

**Figure 3. TfpW topology and structural prediction. A. TfpW is predicted to have a cytoplasmic N-terminus, 11 transmembrane (TM) segments, 5 periplasmic loops and a large periplasmic C-terminal domain (CCTOP). Dual reporter assay to evaluate topology of TfpW in *E. coli* DH5 $\alpha$  strain. Fusion of PhoA/LacZa with amino acids localized in periplasmic region result in blue colonies due to alkaline phosphatase activity (blue cycles), while fusion with cytoplasmic amino acids lead to obtainment of red colonies due to  $\beta$ -galactosidase activity. Purple colonies are observed when fusion is in transmembrane region (purple cycles). Loops in the central region of TfpW have ambiguous topology. Dual indicator plates contained ampicillin (100  $\mu$ g/mL), IPTG (1 mM), BCIP (80  $\mu$ g/mL) and Red-Gal (100  $\mu$ g/mL). B. Structure prediction of TfpW, based on the ArnT template, a 4-deoxy-4-aminoarabinose transferase from *E. coli*.**



*Cupravidas metallireducans* (Phyre 2,(15)). TM domains 5, 6, 7 and 8 in this model seem unreliable, especially in the 180° view.

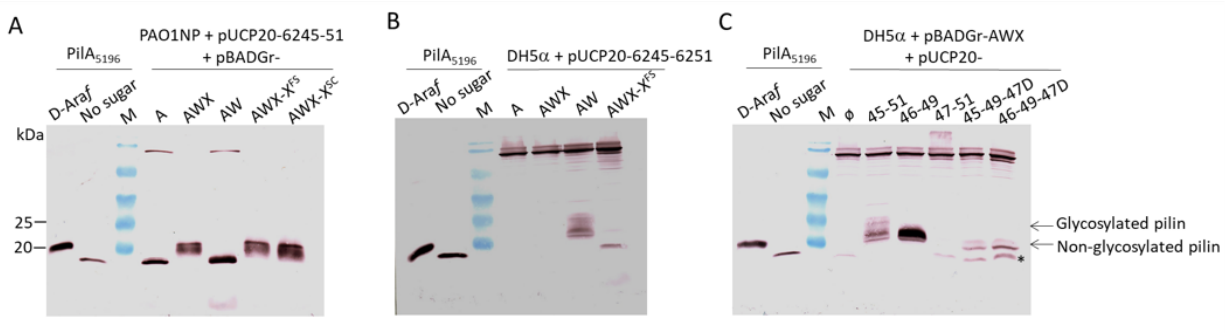

**Figure 4. Reconstitution of Pa5196 pilin arabinosylation in PAO1 (A) and *E. coli* (B and C).** Cell lysates were prepared from cultures grown in LB agar containing 0.05% L-arabinose, 200  $\mu\text{g ml}^{-1}$  carbenicillin, 30  $\mu\text{g ml}^{-1}$  gentamicin for PAO1 or 0.2 % L-arabinose, 100  $\mu\text{g ml}^{-1}$  ampicillin, 15  $\mu\text{g ml}^{-1}$  gentamicin for *E. coli*. Western blot was performed with anti-PilA<sub>IV</sub> primary antibody. **A.** In the PAO1-NP pUCP20-6245-6251 background, PilA<sub>5196</sub> is glycosylated when *tfpW* is expressed even when *tfpX* has a frameshift mutation at Glu16 (expressing only first 15 amino acids, AWX-X<sup>FS</sup>) or a stop codon at the position of L56 (AWX-X<sup>SC</sup>). AWX, AWX-X<sup>FS</sup> and AWX-X<sup>SC</sup> were diluted 10X. **B.** In the *E. coli* DH5 $\alpha$  pUCP20-6245-6251 background, PilA<sub>5196</sub> is glycosylated only when both *tfpW* and *tfpX* are expressed, as a frame shift mutation in *tfpX* at Glu16 (AWX-X<sup>FS</sup>) results in unmodified pilins. **C.** PilA<sub>5196</sub> glycosylation in *E. coli* requires expression of 6246, 6247, DprE1 (6248) and DprE2 (6249), and the AWX cassette. \*Lowest molecular weight band is not unmodified pilins.

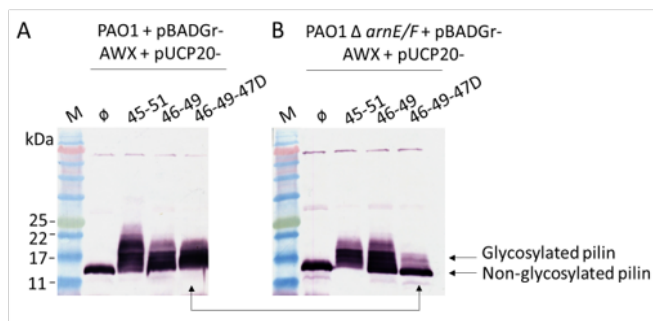

**Figure 5. ArnE/F, an undecaprenyl phosphate aminoarabinose flippase, is necessary for pilin glycosylation in *P. aeruginosa* when 6247 is absent.** PAO1 (parental) (A) and PAO1  $\Delta$ arnE/F (B) strains were transformed with pBADGr-AWX and pUCP20- $\emptyset$  (empty plasmid) / 6245-6251 / 6246-6249 / 6246-6249- $\Delta$ 6247. Cell lysates were prepared from cultures grown in LB agar containing 0.05% L-arabinose, 200  $\mu\text{g ml}^{-1}$  carbenicillin and 30  $\mu\text{g ml}^{-1}$  gentamicin. Western blot was performed with anti-PilA<sub>IV</sub> primary antibody.

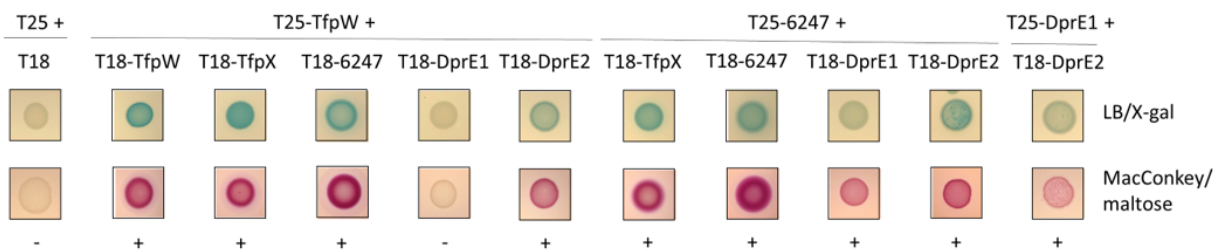

**Figure 6. TfpW interacts with itself, TfpX, and with proteins involved in D-Araf biosynthesis.**

TfpW, TfpX, 6247, DprE1 (6248) and DprE2 (6249) fusions with T18 and T25 fragments of adenylate cyclase were transformed into *E. coli* BTH101 and screened on LB agar/X-gal and MacConkey agar/maltose. TfpW interacts with itself, TfpX, 6247 and DprE2, while 6247 interacts with itself, TfpX, DprE1 and DprE2. Interaction of DprE1 and 2 is also observed. Representative images are shown with positive (+) and negative (-) interactions indicated. At least 3 replicates were performed.

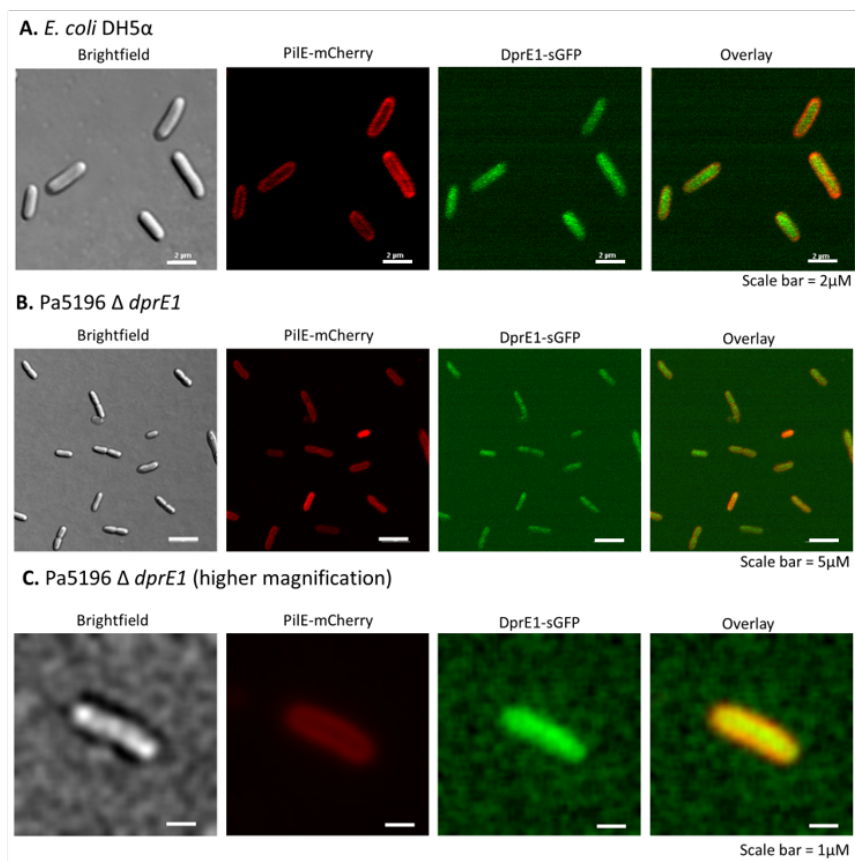

**Figure 7. DprE1 (6248) from *P. aeruginosa* Pa5196 is expressed in the cytoplasm of *E. coli* (A) and Pa5196 Δ *dprE1* (B) strains.** A higher magnification image of Pa5196 Δ *dprE1* strain is shown (C). Fluorescent microscopy analysis of DprE1-sGFP localization shows expression in the cytoplasm (green) while Pile-mCherry is expressed in the periplasm (red) of the cell. The higher magnification image of Pa5196 Δ *dprE1* strain was imaged using an EVOF FL Auto microscope through a Plan Apo 60X (NA=1.40) oil objective in the McMaster Biophotonics Facility, as described on experimental procedure session.

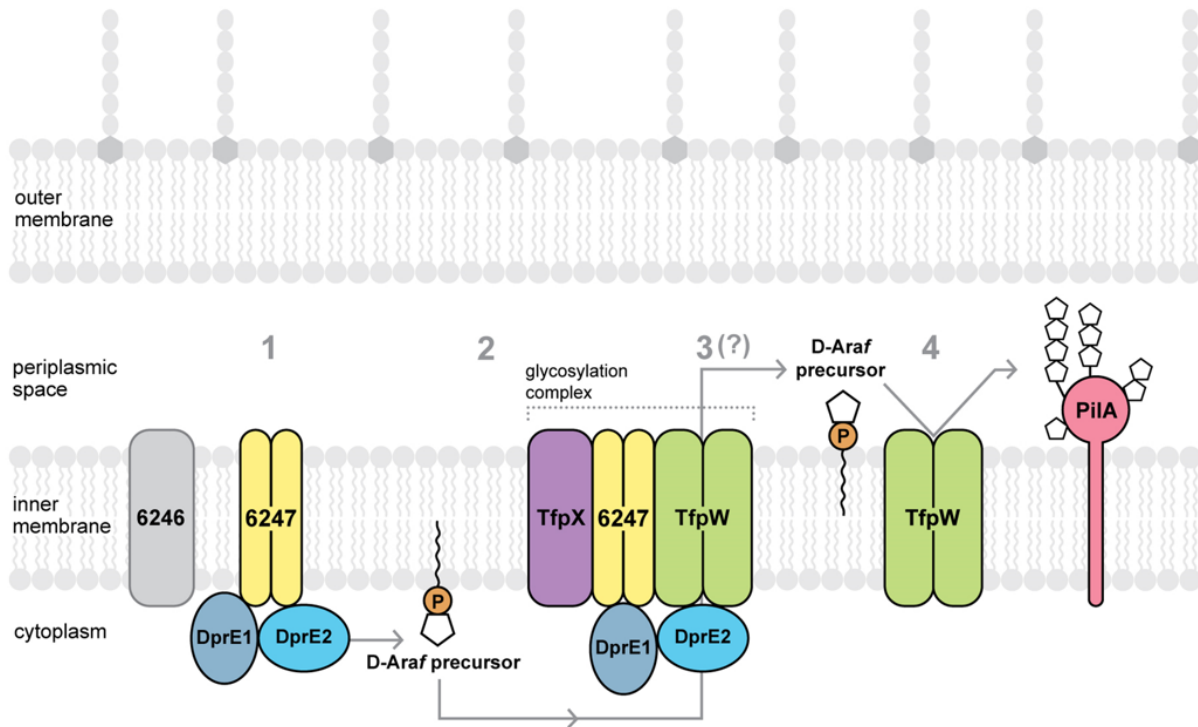

**Figure 8. Proposed model of Pa5196 pilin glycosylation.** A dimer of the GtrA-like protein 6247 interacts with DprE1 (6248) and DprE2 (6249), to form the D-Araf precursor (step 1). 6247 recruits TfpX and TfpW dimers that interact to form the glycosylation complex (step 2). The D-Araf precursor might be translocated from cytoplasm to periplasm by TfpW (step 3). TfpW polymerizes D-Araf precursors into  $\alpha$ -1,5-linked-D-arabinofuranose polymers, and transfers them to multiple Ser and Thr residues of PilA (step 4). Other members of the glycosylation complex, TfpX, 6247, DprE1 and DprE2 were not included on step 4 for concision. 6246, a DPPR synthetase, is essential for pilin glycosylation. Further studies are necessary to investigate whether 6246 interacts with other proteins involved in D-Araf biosynthesis. ArnE/F may replace 6247 function acting as a hub protein and enabling formation of the glycosylation complex.
